# Supplementary material for: Efficacy and Safety of Ciprofloxacin Plus Fluocinolone Acetonide Among Patients With Acute Otitis Externa: A Randomized Clinical Trial
Source: PubMed Central journal article supplement — JAMA Netw Open. 2022 Jul 14;5(7):e2221699. doi: 10.1001/jamanetworkopen.2022.21699 (PMC10881221; doi:10.1001/jamanetworkopen.2022.21699), 2022-07-14
Supplement: jamanetwopen-e2221699-s002.pdf [file jamanetwopen-e2221699-s002.pdf]

## Supplementary Online Content

Chu L, Acosta AM, Aazami H, et al. Efficacy and safety of ciprofloxacin plus fluocinolone acetonide among patients with acute otitis externa: a randomized clinical trial. *JAMA Netw Open*. 2022;5(7):e2221699. doi:10.1001/jamanetworkopen.2022.21699

### **eTable.** Clinical Signs and Symptoms at Visit 3 in the MITT Population

This supplementary material has been provided by the authors to give readers additional information about their work.

**eTable.** Clinical Signs and Symptoms at Visit 3 in the MITT Population

|                                                      | <b>CIPRO+FLUO<br/>N = 103</b> | <b>CIPRO<br/>N = 91</b> | <b>FLUO<br/>N = 45</b> |
|------------------------------------------------------|-------------------------------|-------------------------|------------------------|
| <b>Otorrhea</b>                                      |                               |                         |                        |
| Resolved                                             | 93 (90.3)                     | 73 (80.2)               | 38 (84.4)              |
| Not Resolved                                         | 10 ( 9.7)                     | 18 (19.8)               | 7 (15.6)               |
| Difference in response rate<br>(95% CI) <sup>a</sup> |                               | 10.1 (0.1, 20.1)        | 5.8 (-6.2, 17.9)       |
| P-value <sup>b</sup>                                 |                               | 0.046                   | 0.305                  |
| <b>Otalgia</b>                                       |                               |                         |                        |
| Resolved                                             | 81 (78.6)                     | 61 (67.0)               | 25 (55.6)              |
| Not Resolved                                         | 22 (21.4)                     | 30 (33.0)               | 20 (44.4)              |
| Difference in response rate<br>(95% CI) <sup>a</sup> |                               | 11.6 (-0.9, 24.1)       | 23.1 (6.5, 39.6)       |
| P-value <sup>b</sup>                                 |                               | 0.069                   | 0.004                  |
| <b>Edema</b>                                         |                               |                         |                        |
| Resolved                                             | 70 (68.0)                     | 57 (62.6)               | 26 (57.8)              |
| Not Resolved                                         | 33 (32.0)                     | 34 (37.4)               | 19 (42.2)              |
| Difference in response rate<br>(95% CI) <sup>a</sup> |                               | 5.3 (-8.1, 18.7)        | 10.2 (-6.8, 27.2)      |
| P-value <sup>b</sup>                                 |                               | 0.436                   | 0.233                  |

CI, confidence interval; CIPRO+FLUO, ciprofloxacin plus fluocinolone acetonide, CIPRO, ciprofloxacin alone; FLUO, fluocinolone acetonide alone; MITT, microbiological intent-to-treat.

<sup>a</sup>Difference is calculated as response rate for combined treatment - response rate for individual component.

<sup>b</sup>P-values are calculated using Pearson's Chi Squared test for independence between the combined treatment and each individual component.
